# Supplementary material for: IFI16Expression Is Related to Selected Transcription Factors during B-Cell Differentiation
Source: Hindawi journal article supplement (doi:10.1155/2015/747645), 2015-01-01
Supplement: f1 [file 747645.f1.pdf]

**Supplementary Table 1.** Genes differentially expressed upon CD40 triggering (p<0.05; fold change ≥2; false discovery rate according to Benjamini-Hockeberg)

| Probe Set ID | Gene Symbol                                      | p (Corr)    | FC (abs)  | Regulation CD40neg vs CD40pos |
|--------------|--------------------------------------------------|-------------|-----------|-------------------------------|
| 31472_s_at   | CD44                                             | 7,86E-05    | 2,4346426 | down                          |
| 31557_at     | TMSB4X                                           | 6,47E-08    | 3,2688901 | down                          |
| 33513_at     | SLAMF1                                           | 8,82E-09    | 6,1727204 | down                          |
| 35000_at     | TNFSF9                                           | 1,86E-04    | 2,2321618 | down                          |
| 35957_at     | SNN                                              | 7,85E-05    | 2,0018954 | down                          |
| 36239_at     | POU2AF1                                          | 1,41E-04    | 2,5836744 | up                            |
| 36296_at     | LTA                                              | 1,39E-06    | 4,3666887 | down                          |
| 36773_f_at   | HLA-DQB1 ///<br>LOC100133583 ///<br>LOC100293977 | 2,51E-06    | 5,227808  | down                          |
| 36808_at     | PTPN22                                           | 9,64E-04    | 2,0405164 | up                            |
| 37136_at     | SH2B2                                            | 2,31E-05    | 2,113745  | up                            |
| 37420_i_at   | HLA-F                                            | 1,59E-06    | 3,0793452 | down                          |
| 37455_at     | CXCR5                                            | 3,13E-07    | 2,7838635 | down                          |
| 37483_at     | HDAC9                                            | 8,25E-04    | 2,3922713 | up                            |
| 38242_at     | BLNK                                             | 1,49E-04    | 2,0941443 | up                            |
| 38578_at     | CD27                                             | 1,76E-07    | 3,1569505 | up                            |
| 38893_at     | NCF4                                             | 5,93E-05    | 2,001027  | up                            |
| 38894_g_at   | NCF4                                             | 4,24E-06    | 2,0301292 | up                            |
| 38917_at     | TRD@                                             | 0,001972864 | 2,0782807 | up                            |
| 39231_at     | CHD1                                             | 8,29E-06    | 2,308072  | down                          |
| 40362_at     | NFKB2                                            | 1,33E-04    | 2,2769434 | down                          |
| 41106_at     | KCNN4                                            | 2,53E-06    | 2,1241715 | down                          |
| 41690_at     | ARID5B                                           | 5,86E-07    | 2,946656  | down                          |
| 31856_at     | LRRC32                                           | 1,04E-05    | 3,483104  | down                          |
| 32129_at     | RNF115                                           | 3,69E-05    | 2,0368357 | down                          |
| 32640_at     | ICAM1                                            | 9,25E-05    | 2,6988692 | down                          |
| 33804_at     | PTK2B                                            | 5,71E-05    | 2,1969037 | down                          |
| 34677_f_at   | LOC162632 ///<br>LOC220594 /// USP32<br>/// USP6 | 9,98E-04    | 2,1406088 | up                            |
| 35614_at     | TCFL5                                            | 6,83E-05    | 3,2490892 | down                          |
| 35985_at     | AKAP2 /// PALM2-<br>AKAP2                        | 8,72E-05    | 2,2250805 | up                            |
| 36537_at     | ARHGEF18                                         | 1,29E-05    | 2,7902102 | up                            |
| 36878_f_at   | HLA-DQB1                                         | 1,35E-06    | 5,153037  | down                          |
| 37177_at     | CD58                                             | 9,80E-09    | 9,740763  | down                          |
| 37536_at     | CD83                                             | 1,13E-06    | 3,6934023 | down                          |
| 37542_at     | LHFPL2                                           | 2,94E-06    | 4,9178615 | down                          |
| 37625_at     | IRF4                                             | 2,71E-05    | 2,4647584 | down                          |
| 38276_at     | NFKBIE                                           | 8,56E-07    | 2,1693919 | down                          |
| 38631_at     | TNFAIP2                                          | 1,61E-08    | 5,8500648 | down                          |
| 38717_at     | METTL7A                                          | 5,55E-05    | 2,6242304 | up                            |
| 39039_s_at   | UBE2J1                                           | 4,39E-04    | 2,1238678 | up                            |
| 39040_at     | UBE2J1                                           | 3,39E-05    | 2,479652  | up                            |
| 39402_at     | IL1B                                             | 1,93E-05    | 2,549196  | down                          |
| 39728_at     | IFI30                                            | 1,71E-06    | 2,0604205 | down                          |
| 40091_at     | BCL6                                             | 2,17E-05    | 4,650867  | up                            |

|            |                                                                                                                                                     |             |           |      |
|------------|-----------------------------------------------------------------------------------------------------------------------------------------------------|-------------|-----------|------|
| 40153_at   | TAP1                                                                                                                                                | 2,38E-06    | 2,454961  | down |
| 41723_s_at | HLA-DRB1 /// HLA-DRB3<br>/// HLA-DRB4 /// HLA-<br>DRB5 /// HLA-DRB6 ///<br>LOC100294036 ///<br>LOC100509582 ///<br>LOC100510495 ///<br>LOC100510519 | 1,51E-04    | 2,3210213 | down |
| 32193_at   | PLXNC1                                                                                                                                              | 2,56E-05    | 2,0570738 | down |
| 32227_at   | SRGN                                                                                                                                                | 5,57E-07    | 5,2068543 | down |
| 32773_at   | HLA-DQA1                                                                                                                                            | 1,59E-05    | 2,2090333 | down |
| 32786_at   | JUNB                                                                                                                                                | 5,81E-05    | 2,0716155 | down |
| 33338_at   | STAT1                                                                                                                                               | 1,51E-04    | 2,2681913 | down |
| 33439_at   | SIK1                                                                                                                                                | 2,26E-05    | 2,621589  | down |
| 34885_at   | SYNGR2                                                                                                                                              | 1,24E-07    | 2,6065996 | down |
| 36103_at   | CCL3                                                                                                                                                | 1,63E-07    | 11,555569 | down |
| 36179_at   | MAPKAPK2                                                                                                                                            | 1,66E-05    | 2,345878  | down |
| 36180_s_at | MAPKAPK2                                                                                                                                            | 2,14E-05    | 2,0059936 | down |
| 36575_at   | RGS1                                                                                                                                                | 2,64E-07    | 4,463683  | down |
| 36617_at   | ID1                                                                                                                                                 | 2,93E-05    | 2,7934341 | up   |
| 36618_g_at | ID1                                                                                                                                                 | 1,23E-04    | 2,735503  | up   |
| 37006_at   | IGJ                                                                                                                                                 | 1,13E-04    | 2,590326  | up   |
| 37024_at   | LITAF                                                                                                                                               | 2,67E-07    | 8,536645  | down |
| 37025_at   | LITAF                                                                                                                                               | 1,00E-05    | 2,7826881 | down |
| 37043_at   | ID3                                                                                                                                                 | 3,33E-07    | 2,1811166 | up   |
| 37328_at   | PLEK                                                                                                                                                | 2,66E-06    | 3,2922337 | down |
| 37691_at   | LOC729991-MEF2B ///<br>MEF2B                                                                                                                        | 3,07E-06    | 2,289475  | up   |
| 37711_at   | MEF2C                                                                                                                                               | 5,25E-04    | 2,202418  | down |
| 37759_at   | LAPTM5                                                                                                                                              | 1,06E-04    | 4,201958  | down |
| 38096_f_at | HLA-DPB1                                                                                                                                            | 0,004603755 | 2,1534047 | down |
| 38391_at   | CAPG                                                                                                                                                | 4,27E-06    | 2,1796553 | down |
| 38415_at   | PTP4A2                                                                                                                                              | 0,001873488 | 2,2029583 | up   |
| 39822_s_at | GADD45B                                                                                                                                             | 1,29E-05    | 2,27891   | down |
| 39827_at   | DDIT4                                                                                                                                               | 1,67E-04    | 3,127329  | down |
| 41790_at   | ALDH5A1                                                                                                                                             | 1,02E-04    | 2,0964756 | up   |
| 32616_at   | LYN                                                                                                                                                 | 4,24E-06    | 2,3925354 | down |
| 2042_s_at  | MYB                                                                                                                                                 | 5,15E-07    | 2,3905349 | down |
| 2036_s_at  | CD44                                                                                                                                                | 2,50E-05    | 3,9111266 | down |
| 2024_s_at  | LYN                                                                                                                                                 | 5,90E-05    | 2,1390023 | down |
| 2002_s_at  | BCL2A1                                                                                                                                              | 2,46E-06    | 3,6291728 | down |
| 2011_s_at  | BIK                                                                                                                                                 | 5,65E-04    | 2,3138027 | up   |
| 1909_at    | BCL2                                                                                                                                                | 2,98E-05    | 2,3839056 | down |
| 1867_at    | CFLAR                                                                                                                                               | 1,62E-05    | 2,2425609 | down |
| 1868_g_at  | CFLAR                                                                                                                                               | 1,13E-06    | 3,061496  | down |
| 1852_at    | TNF                                                                                                                                                 | 1,90E-08    | 3,9721708 | down |
| 1857_at    | SMAD7                                                                                                                                               | 3,10E-05    | 2,425706  | down |
| 1520_s_at  | IL1B                                                                                                                                                | 1,72E-05    | 2,4006371 | down |
| 1461_at    | NFKBIA                                                                                                                                              | 2,44E-06    | 2,746719  | down |
| 1402_at    | LYN                                                                                                                                                 | 1,82E-04    | 2,1747775 | down |
| 1373_at    | TCF3                                                                                                                                                | 1,27E-05    | 2,8388565 | up   |
| 1292_at    | DUSP2                                                                                                                                               | 2,83E-07    | 3,3349469 | down |
| 1126_s_at  | CD44                                                                                                                                                | 2,03E-05    | 3,64973   | down |
| 1097_s_at  | CCR7                                                                                                                                                | 8,16E-07    | 8,9604025 | down |
| 1110_at    | TRD@                                                                                                                                                | 1,81E-05    | 2,0116029 | up   |

|           |         |             |           |      |
|-----------|---------|-------------|-----------|------|
| 1003_s_at | CXCR5   | 2,38E-06    | 2,2997074 | down |
| 1004_at   | CXCR5   | 1,22E-07    | 3,6967244 | down |
| 925_at    | IFI30   | 5,35E-05    | 2,2930064 | down |
| 931_at    | GPR183  | 8,13E-07    | 7,246555  | down |
| 848_at    | TRAF1   | 4,17E-07    | 3,7861829 | down |
| 849_g_at  | TRAF1   | 5,32E-09    | 4,969944  | down |
| 717_at    | TRIB2   | 9,65E-05    | 2,185458  | up   |
| 595_at    | TNFAIP3 | 1,59E-07    | 3,632786  | down |
| 544_at    | NFKB2   | 3,57E-05    | 2,3456557 | down |
| 545_g_at  | NFKB2   | 1,94E-05    | 2,1398354 | down |
| 535_s_at  | NFKB2   | 0,001768874 | 2,1464076 | down |
| 506_s_at  | STAT5A  | 1,22E-07    | 3,8831184 | down |
| 478_g_at  | IRF5    | 2,70E-06    | 2,313924  | down |
| 258_at    | LTA     | 1,93E-05    | 3,319018  | down |
| 1456_s_at | IFI16   | 0,85058695  | 1,0393113 | up   |
